# Supplementary material for: U-Shaped Association between Waist-to-Hip Ratio and All-Cause Mortality in Stage 3–5 Chronic Kidney Disease Patients with Body Mass Index Paradox
Source: MDPI journal article supplement (doi:10.3390/jpm11121355), 2021-12-13
Supplement: s1 [file s1]

**Supplement Table S1. Multivariate linear regression for waist-to-hip ratio (per 0.05 increase)**

|                                      | Beta coefficient | 95% CI Beta coefficient | P value |
|--------------------------------------|------------------|-------------------------|---------|
| Constant                             | 13.213           |                         |         |
| Age (years)                          | 0.034            | 0.028 to 0.040          | <0.001  |
| Gender (female vs male)              | -0.675           | -0.845 to -0.505        | <0.001  |
| eGFR (ml/min/1.73 m <sup>2</sup> )   | -0.004           | -0.012 to 0.003         | 0.278   |
| Ucr log                              | 0.243            | 0.062 to 0.424          | 0.008   |
| Diabetes mellitus                    | 0.245            | 0.056 to 0.434          | 0.011   |
| Cardiovascular disease               | 0.120            | -0.061 to 0.301         | 0.194   |
| Smoker                               | 0.119            | -0.123 to 0.362         | 0.335   |
| Cancer                               | -0.113           | -0.377 to 0.152         | 0.404   |
| Severe liver disease                 | -0.115           | -0.460 to 0.230         | 0.513   |
| Hypertension                         | -0.106           | -0.271 to 0.060         | 0.210   |
| Hemoglobin (g/dl)                    | 0.004            | -0.046 to 0.054         | 0.869   |
| Body mass index (kg/m <sup>2</sup> ) | 0.135            | 0.114 to 0.157          | <0.001  |
| Cholesterol log                      | -0.150           | -0.858 to 0.558         | 0.678   |
| Glycosylated hemoglobin (%)          | 0.029            | -0.029 to 0.086         | 0.332   |
| Albumin (g/dl)                       | 0.037            | -0.134 to 0.208         | 0.669   |
| CRP ln                               | 0.095            | 0.007 to 0.183          | 0.034   |
| Phosphorus (mg/dl)                   | -0.025           | -0.102 to 0.051         | 0.516   |

Abbreviations: WHR: waist-to-hip ratio, CI: confidence interval, eGFR: estimated glomerular filtration rate, Ucr: urine protein and creatinine ratio, CRP: C-reactive protein.

**Supplement Table S2. Hazard ratios for mortality according to waist-to-height ratio**

| HR for mortality |                      | Waist-to-height ratio |                  |                  |                   |                   |
|------------------|----------------------|-----------------------|------------------|------------------|-------------------|-------------------|
|                  |                      | Q1                    | Q2               | Q3               | Q4                | Q5                |
|                  | WHTR (%) Male        | <48.8                 | 48.8-52.6        | 52.6-56          | 56-60.2           | >60.2             |
|                  | WHTR (%) Female      | <47.5                 | 47.5-52.6        | 52.6-57.3        | 57.3-62.6         | >62.6             |
| Male             | Adjusted model       | 1.59 (1.19-2.12)*     | 1.24 (0.91-1.69) | 1 (reference)    | 1.30 (0.97-1.74)  | 1.30 (0.98-1.72)  |
|                  | Adjusted model + BMI | 1.25 (0.91-1.71)      | 1.13 (0.82-1.55) | 1 (reference)    | 1.41 (1.04-1.90)* | 1.41 (1.05-1.89)* |
| Female           | Adjusted model       | 1.08 (0.74-1.57)      | 1 (reference)    | 1.23 (0.87-1.73) | 1.18 (0.84-1.67)  | 1.08 (0.77-1.52)  |
|                  | Adjusted model + BMI | 1.03 (0.71-1.50)      | 1 (reference)    | 1.40 (0.98-2.00) | 1.39 (0.97-1.99)  | 1.45 (0.99-2.11)  |

Values expressed as hazard ratio (HR) and 95% confidence interval (CI).

Adjusted model: adjusted for age, gender, eGFR, Upcr log, diabetes, cardiovascular disease, smoker, cancer, severe liver disease, hypertension, hemoglobin, cholesterol log, glycosylated hemoglobin, albumin, CRP ln and phosphorus.

\* $P < 0.05$  compared with reference WHTR category.

Abbreviations: HR: hazard ratio, WHTR: waist-to-height ratio, BMI: Body mass index, eGFR: estimated glomerular filtration rate, Upcr: urine protein and creatinine ratio, CRP: C-reactive protein.

**Supplement Table S3. Hazard ratios for mortality according to waist circumference**

| HR for mortality |                      | Waist circumference |                  |                  |                  |                  |
|------------------|----------------------|---------------------|------------------|------------------|------------------|------------------|
|                  |                      | Q1                  | Q2               | Q3               | Q4               | Q5               |
| Male             | Adjusted model       | 1.52 (1.15-2.01) *  | 1.15 (0.86-1.54) | 1.26 (0.94-1.68) | 1 (reference)    | 1.26 (0.96-1.66) |
|                  | Adjusted model + BMI | 1.15 (0.84-1.57)    | 1.00 (0.73-1.37) | 1.19 (0.89-1.60) | 1 (reference)    | 1.25 (0.94-1.66) |
| Female           | Adjusted model       | 1.06 (0.74-1.51)    | 1 (reference)    | 1.25 (0.90-1.75) | 0.98 (0.69-1.37) | 1.00 (0.72-1.40) |
|                  | Adjusted model + BMI | 1.01 (0.70-1.46)    | 1 (reference)    | 1.39 (0.99-1.96) | 1.11 (0.78-1.59) | 1.29 (0.89-1.86) |

Values expressed as hazard ratio (HR) and 95% confidence interval (CI).

Adjusted model: adjusted for age, gender, eGFR, Upcr log, diabetes, cardiovascular disease, smoker, cancer, severe liver disease, hypertension, hemoglobin,

cholesterol log, glycosylated hemoglobin, albumin, CRP ln and phosphorus.

\* $P < 0.05$  compared with reference WC category.

Abbreviations: BMI: Body mass index, HR: hazard ratio, WC: waist circumference, eGFR: estimated glomerular filtration rate, Upcr: urine protein and creatinine ratio, CRP: C-reactive protein.

**Supplement Table S4. Hazard ratios for mortality according to hip-to-height ratio**

| HR for mortality |                      | Hip-to-height ratio |                  |                  |                   |                  |
|------------------|----------------------|---------------------|------------------|------------------|-------------------|------------------|
|                  |                      | Q1                  | Q2               | Q3               | Q4                | Q5               |
| Male             | Adjusted model       | 1 (reference)       | 0.99 (0.75-1.31) | 0.87 (0.66-1.13) | 0.83 (0.62-1.09)  | 0.85 (0.65-1.11) |
|                  | Adjusted model + BMI | 1 (reference)       | 1.25 (0.93-1.68) | 1.23 (0.90-1.67) | 1.22 (0.87-1.70)  | 1.34 (0.93-1.92) |
| Female           | Adjusted model       | 1 (reference)       | 1.02 (0.73-1.44) | 1.07 (0.77-1.49) | 1.17 (0.84-1.62)  | 0.86 (0.62-1.21) |
|                  | Adjusted model + BMI | 1 (reference)       | 1.10 (0.77-1.56) | 1.27 (0.88-1.83) | 1.51 (1.03-2.22)* | 1.30 (0.83-2.04) |

Values expressed as hazard ratio (HR) and 95% confidence interval (CI).

Adjusted model: adjusted for age, gender, eGFR, Upcr log, diabetes, cardiovascular disease, smoker, cancer, severe liver disease, hypertension, hemoglobin, cholesterol log, glycosylated hemoglobin, albumin, CRP ln and phosphorus.

\* $P < 0.05$  compared with reference HHR category.

Abbreviations: BMI: Body mass index, HR: hazard ratio, WHR: waist-to-hip ratio, eGFR: estimated glomerular filtration rate, Upcr: urine protein and creatinine ratio, CRP: C-reactive protein

**Supplement Table S5. Hazard ratios for mortality according to metabolic syndrome components and inflammation**

| HR for mortality |                              | C-reactive protein |                   |                   |                    |                    |
|------------------|------------------------------|--------------------|-------------------|-------------------|--------------------|--------------------|
|                  |                              | Q1                 | Q2                | Q3                | Q4                 | Q5                 |
| Male             | Adjusted model               | 1 (reference)      | 1.62 (1.14-2.30)* | 1.60 (1.13-2.26)* | 2.18 (1.57-3.03)** | 2.69 (1.95-3.70)** |
|                  | Adjusted model + BMI and WHR | 1 (reference)      | 1.41 (0.99-2.01)  | 1.53 (1.08-2.17)* | 1.78 (1.28-2.49)** | 2.27 (1.64-3.14)** |
| Female           | Adjusted model               | 1 (reference)      | 1.12 (0.79-1.57)  | 1.00 (0.70-1.43)  | 1.18 (0.84-1.64)   | 1.31 (0.94-1.82)   |
|                  | Adjusted model + BMI and WHR | 1 (reference)      | 1.08 (0.76-1.53)  | 1.03 (0.72-1.48)  | 1.13 (0.81-1.59)   | 1.25 (0.89-1.75)   |

| HR for mortality |                              | Glycosylated hemoglobin |                  |                   |                  |                   |
|------------------|------------------------------|-------------------------|------------------|-------------------|------------------|-------------------|
|                  |                              | Q1                      | Q2               | Q3                | Q4               | Q5                |
| Male             | Adjusted model               | 1.41 (1.04-1.92)*       | 1 (reference)    | 0.98 (0.71-1.34)  | 1.23 (0.89-1.70) | 1.53 (1.09-2.15)* |
|                  | Adjusted model + BMI and WHR | 1.31 (0.96-1.78)        | 1 (reference)    | 1.01 (0.73-1.39)  | 1.22 (0.88-1.69) | 1.49 (1.06-2.11)* |
| Female           | Adjusted model               | 1.10 (0.77-1.56)        | 1 (reference)    | 1.10 (0.78-1.56)  | 1.42 (1.00-2.00) | 1.34 (0.93-1.95)  |
|                  | Adjusted model + BMI and WHR | 1.05 (0.74-1.51)        | 1 (reference)    | 1.15 (0.81-1.65)  | 1.42 (1.00-2.01) | 1.35 (0.93-1.97)  |
| HR for mortality |                              | HDL-cholesterol         |                  |                   |                  |                   |
|                  |                              | Q1                      | Q2               | Q3                | Q4               | Q5                |
| Male             | Adjusted model               | 0.94 (0.71-1.24)        | 0.99 (0.75-1.30) | 1.07 (0.81-1.41)  | 1.09 (0.82-1.44) | 1 (reference)     |
|                  | Adjusted model + BMI and WHR | 1.06 (0.79-1.42)        | 1.14 (0.86-1.52) | 1.21 (0.91-1.61)  | 1.19 (0.89-1.58) | 1 (reference)     |
| Female           | Adjusted model               | 1.27 (0.90-1.78)        | 1.28 (0.91-1.80) | 0.95 (0.66-1.37)  | 1.22 (0.85-1.73) | 1 (reference)     |
|                  | Adjusted model + BMI and WHR | 1.17 (0.82-1.69)        | 1.22 (0.86-1.73) | 1.01 (0.70-1.46)  | 1.29 (0.90-1.84) | 1 (reference)     |
| HR for mortality |                              | Systolic blood pressure |                  |                   |                  |                   |
|                  |                              | Q1                      | Q2               | Q3                | Q4               | Q5                |
| Male             | Adjusted model               | 1.52 (1.13-2.04)*       | 1 (reference)    | 1.41 (1.06-1.88)* | 1.02 (0.76-1.36) | 1.36 (1.02-1.81)* |
|                  | Adjusted model + BMI and WHR | 1.33 (0.99-1.79)        | 1 (reference)    | 1.40 (1.05-1.87)* | 1.07 (0.79-1.44) | 1.27 (0.95-1.69)  |
| Female           | Adjusted model               | 1 (reference)           | 1.15 (0.81-1.64) | 1.08 (0.77-1.53)  | 1.17 (0.83-1.64) | 1.30 (0.92-1.83)  |
|                  | Adjusted model + BMI and WHR | 1 (reference)           | 1.28 (0.90-1.83) | 1.21 (0.85-1.71)  | 1.36 (0.96-1.93) | 1.40 (0.98-2.01)  |
| HR for mortality |                              | Triglyceride            |                  |                   |                  |                   |
|                  |                              | Q1                      | Q2               | Q3                | Q4               | Q5                |
| Male             | Adjusted model               | 1.42 (1.06-1.89)*       | 1.26 (0.94-1.68) | 1.18 (0.88-1.58)  | 1.09 (0.82-1.47) | 1 (reference)     |
|                  | Adjusted model + BMI and WHR | 1.17 (0.85-1.61)        | 1.13 (0.83-1.54) | 1.06 (0.78-1.45)  | 1.03 (0.76-1.40) | 1 (reference)     |
| Female           | Adjusted model               | 1.40 (1.00-1.96)*       | 1.09 (0.79-1.51) | 0.98 (0.70-1.38)  | 1.04 (0.75-1.43) | 1 (reference)     |
|                  | Adjusted model + BMI and WHR | 1.26 (0.88-1.81)        | 1.11 (0.78-1.57) | 1.00 (0.70-1.42)  | 1.04 (0.75-1.45) | 1 (reference)     |

Values expressed as hazard ratio (HR) and 95% confidence interval (CI).

Adjusted model: adjusted for age, gender, eGFR, Upcr log, diabetes, cardiovascular disease, smoker, cancer, severe liver disease, hypertension, hemoglobin, cholesterol log, glycosylated hemoglobin, albumin, CRP ln and phosphorus.

\* $P < 0.05$  compared with reference metabolic syndrome component category.

**\*\*** $P < 0.001$  compared with reference metabolic syndrome component category.

Abbreviations: HR: hazard ratio, BMI: Body mass index, WHR: Waist-to-hip ratio, eGFR: estimated glomerular filtration rate, Upcr: urine protein and creatinine ratio, CRP: C-reactive protein.

**Supplement Table S6. Hazard ratios for mortality according to malnutrition-inflammation syndrome**

| HR for mortality |                              | Waist-to-hip ratio                   |                   |                  |                   |                   |                  |
|------------------|------------------------------|--------------------------------------|-------------------|------------------|-------------------|-------------------|------------------|
|                  |                              | Q1                                   | Q2                | Q3               | Q4                | Q5                |                  |
| Male             | Adjusted model               | 1.56 (1.16-2.10)*                    | 1 (reference)     | 1.07 (0.77-1.47) | 1.28 (0.94-1.74)  | 1.26 (0.94-1.69)  |                  |
|                  | Adjusted model + BMI         | 1.53 (1.13-2.05)*                    | 1 (reference)     | 1.15 (0.84-1.60) | 1.40 (1.03-1.91)* | 1.39 (1.03-1.87)* |                  |
|                  | Adjusted model + BMI and MIS | 1.48 (1.10-2.00)*                    | 1 (reference)     | 1.15 (0.83-1.59) | 1.40 (1.03-1.91)* | 1.40 (1.04-1.89)* |                  |
| Female           | Adjusted model               | 1.35 (0.94-1.95)                     | 1.23 (0.85-1.79)  | 1 (reference)    | 1.59 (1.14-2.22)* | 1.38 (0.99-1.92)  |                  |
|                  | Adjusted model + BMI         | 1.28 (0.88-1.85)                     | 1.21 (0.83-1.76)  | 1 (reference)    | 1.63 (1.17-2.27)* | 1.42 (1.02-1.99)* |                  |
|                  | Adjusted model + BMI and MIS | 1.24 (0.86-1.81)                     | 1.20 (0.83-1.75)  | 1 (reference)    | 1.60 (1.14-2.23)* | 1.41 (1.01-1.96)* |                  |
| HR for mortality |                              | Body mass index (kg/m <sup>2</sup> ) |                   |                  |                   |                   |                  |
|                  |                              | 15.0-20.0                            | 20.0-22.5         | 22.5-25.0        | 25.0-27.5         | 27.5-30.0         | 30.0-35.0        |
| Male             | Adjusted model               | 2.57 (1.75-3.75)**                   | 1.46 (1.04-2.05)* | 1.20 (0.88-1.64) | 1.16 (0.84-1.61)  | 1 (reference)     | 1.35(0.87-2.09)  |
|                  | Adjusted model + WHR         | 2.59 (1.76-3.82)**                   | 1.52 (1.08-2.15)* | 1.23 (0.90-1.67) | 1.18 (0.85-1.64)  | 1 (reference)     | 1.34 (0.86-2.09) |
|                  | Adjusted model + WHR and MIS | 2.45 (1.66-3.62)**                   | 1.53 (1.08-2.16)* | 1.24 (0.90-1.69) | 1.19 (0.86-1.64)  | 1 (reference)     | 1.31 (0.84-2.03) |
| Female           | Adjusted model               | 1.59 (0.99-2.55)                     | 1.75 (1.14-2.69)* | 1.42 (0.93-2.17) | 1.33 (0.86-2.06)  | 1.33 (0.83-2.14)  | 1 (reference)    |
|                  | Adjusted model + WHR         | 1.69 (1.04-2.73)*                    | 1.82 (1.18-2.81)* | 1.50 (0.98-2.29) | 1.34 (0.86-2.09)  | 1.38 (0.86-2.21)  | 1 (reference)    |
|                  | Adjusted model + WHR and MIS | 1.65 (1.02-2.68)                     | 1.83 (1.18-2.82)  | 1.51 (0.99-2.32) | 1.37 (0.88-2.13)  | 1.40 (0.87-2.25)  | 1 (reference)    |

Values expressed as hazard ratio (HR) and 95% confidence interval (CI).

Adjusted model: adjusted for age, gender, eGFR, Upcr log, diabetes, cardiovascular disease, smoker, cancer, severe liver disease, hypertension, hemoglobin, cholesterol log, glycosylated hemoglobin, albumin, CRP ln and phosphorus.

\* $P < 0.05$  compared with reference metabolic syndrome component category.

\*\* $P < 0.001$  compared with reference metabolic syndrome component category.

Abbreviations: HR: hazard ratio, BMI: Body mass index, MIS: malnutrition-inflammation syndrome, WHR: Waist-to-hip ratio, eGFR: estimated glomerular

filtration rate, Upcr: urine protein and creatinine ratio, CRP: C-reactive protein.

**Supplement Table S7. Odds ratios for malnutrition-inflammation according to body mass index and waist-to-hip ratio**

| OR     | for                  | BMI (kg/m <sup>2</sup> )      |                   |                  |                  |                  |                  |
|--------|----------------------|-------------------------------|-------------------|------------------|------------------|------------------|------------------|
|        |                      | malnutrition-<br>inflammation | 15.0-20.0         | 20.1-22.5        | 22.6-25.0        | 25.1-27.5        | 27.6-30.0        |
| Male   | Adjusted model       | 13.0 (6.3-26.8)*              | 1.32 (0.81-2.15)  | 0.97 (0.63-1.49) | 0.97 (0.63-1.49) | 1 (reference)    | 1.46 (0.81-2.64) |
|        | Adjusted model + WHR | 10.9 (5.2-22.9)*              | 1.21 (0.73-2.00)  | 0.94 (0.61-1.46) | 1.06 (0.68-1.66) | 1 (reference)    | 1.51 (0.83-2.75) |
| Female | Adjusted model       | 12.8 (6.9-23.7)*              | 1.86 (1.16-2.99)* | 1.36 (0.86-2.14) | 1 (reference)    | 1.36 (0.86-2.14) | 1.49 (0.81-2.76) |
|        | Adjusted model + WHR | 11.8 (6.3-22.1)*              | 1.75 (1.08-2.82)* | 1.33 (0.84-2.11) | 1 (reference)    | 1.30 (0.75-2.26) | 1.58 (0.85-2.94) |
| OR     | for                  | Waist-to-hip ratio            |                   |                  |                  |                  |                  |
|        |                      | malnutrition-<br>inflammation | Q1                | Q2               | Q3               | Q4               | Q5               |
| Male   | Adjusted model       | 2.07 (1.38-3.12)#             | 1 (reference)     | 0.96 (0.64-1.43) | 0.98 (0.65-1.46) | 0.98 (0.65-1.46) |                  |
|        | Adjusted model + BMI | 1.73 (1.13-2.64)#             | 1 (reference)     | 1.05 (0.70-1.58) | 1.06 (0.70-1.60) | 1.01 (0.66-1.56) |                  |
| Female | Adjusted model       | 2.22 (1.39-3.54)#             | 1.39 (0.89-2.18)  | 1 (reference)    | 1.14 (0.73-1.79) | 1.14 (0.73-1.79) |                  |
|        | Adjusted model + BMI | 1.75 (1.06-2.87)#             | 1.38 (0.86-2.20)  | 1 (reference)    | 1.16 (0.72-1.86) | 1.03 (0.63-1.69) |                  |

Values expressed as odds ratio (OR) and 95% confidence interval (CI).

Adjusted model: adjusted for age, gender, eGFR, Upcr log, diabetes, cardiovascular disease, smoker, cancer, severe liver disease, hypertension, hemoglobin, cholesterol log, glycosylated hemoglobin, albumin, CRP ln and phosphorus.

\**P* < 0.001 compared with reference BMI category.

#*P* < 0.05 compared with reference WHR category.

Abbreviations: BMI: Body mass index, HR: hazard ratio, WHR: waist-to-hip ratio, eGFR: estimated glomerular filtration rate, Upcr: urine protein and creatinine ratio, CRP: C-reactive protein.
